# Supplementary material
Source: publisher site journal article supplement (https://www.dovepress.com/get_supplementary_file.php?f=487055.docx)
Supplement: Supplementary file 1 [file get_supplementary_file.php]

**Supplemental Online Content**

**eTable 1.** Risk of bias summary for randomized studies (RoB 2).

**eFigure 1.** Trial sequential analysis of safety outcomes.

**eFigure 1A.** Trial sequential analysis of the incidence of ocular adverse events.

**eFigure 1B.** Trial sequential analysis of the incidence of adverse events of special interest.

**eFigure 1C.** Trial sequential analysis of the incidence of intraocular inflammation.

**eFigure 1D.** Trial sequential analysis of the incidence of retinal vasculitis.

**eTable 1. Risk of bias summary for randomized studies (RoB 2).**

| **Study** | **Bias arising from the randomization process** | **Bias due to deviations from intended interventions** | **Bias due to missing outcome data** | **Bias in measurement of the outcome** | **Bias in selection of the reported result** | **Overall risk of bias** |
| --- | --- | --- | --- | --- | --- | --- |
| **KESTREL, 2023** 20 | Low | Low | Low | Low | Low | Low |
| **KITE, 2023** 20 | Low | Low | Low | Low | Low | Low |
| **KINGFISHER, 2023** 21 | Low | Low | Low | Low | Low | Low |

**eFigure 1.** Trial sequential analysis of safety outcomes. The Z-curve (blue full line) corresponds to the cumulative Z-score of our meta-analysis as each RCT is included. The dark red full lines represent the conventional test boundaries. Bright red full lines represent the trial sequential monitoring boundaries.

**eFigure 1A.** Trial sequential analysis of the incidence of ocular adverse events. The required information size to detect or reject the effect size found in our meta-analysis is calculated to 4,074 patients and 4,074 eyes, with a double sided α of 0.05 and a β of 0.20 (power of 80%). The cumulative Z-curve did not reach any of the boundaries.


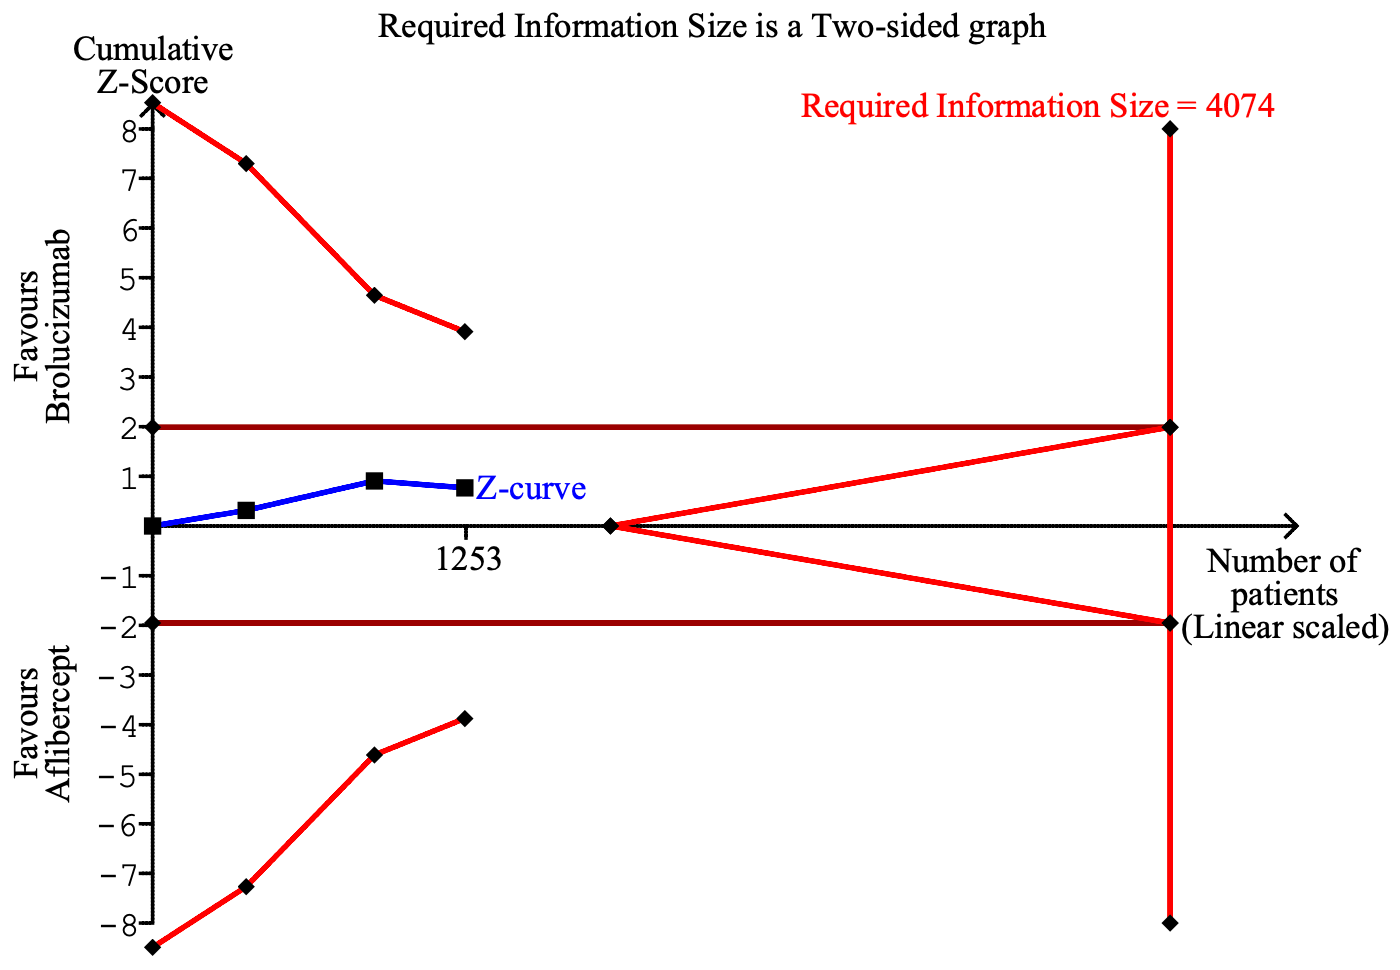


**eFigure 1B.** Trial sequential analysis of the incidence of adverse events of special interest. The required information size to detect or reject the effect size found in our meta-analysis is calculated to 2,906 patients and 2,906 eyes, with a double sided α of 0.05 and a β of 0.20 (power of 80%). The cumulative Z-curve did not reach any of the boundaries.

**
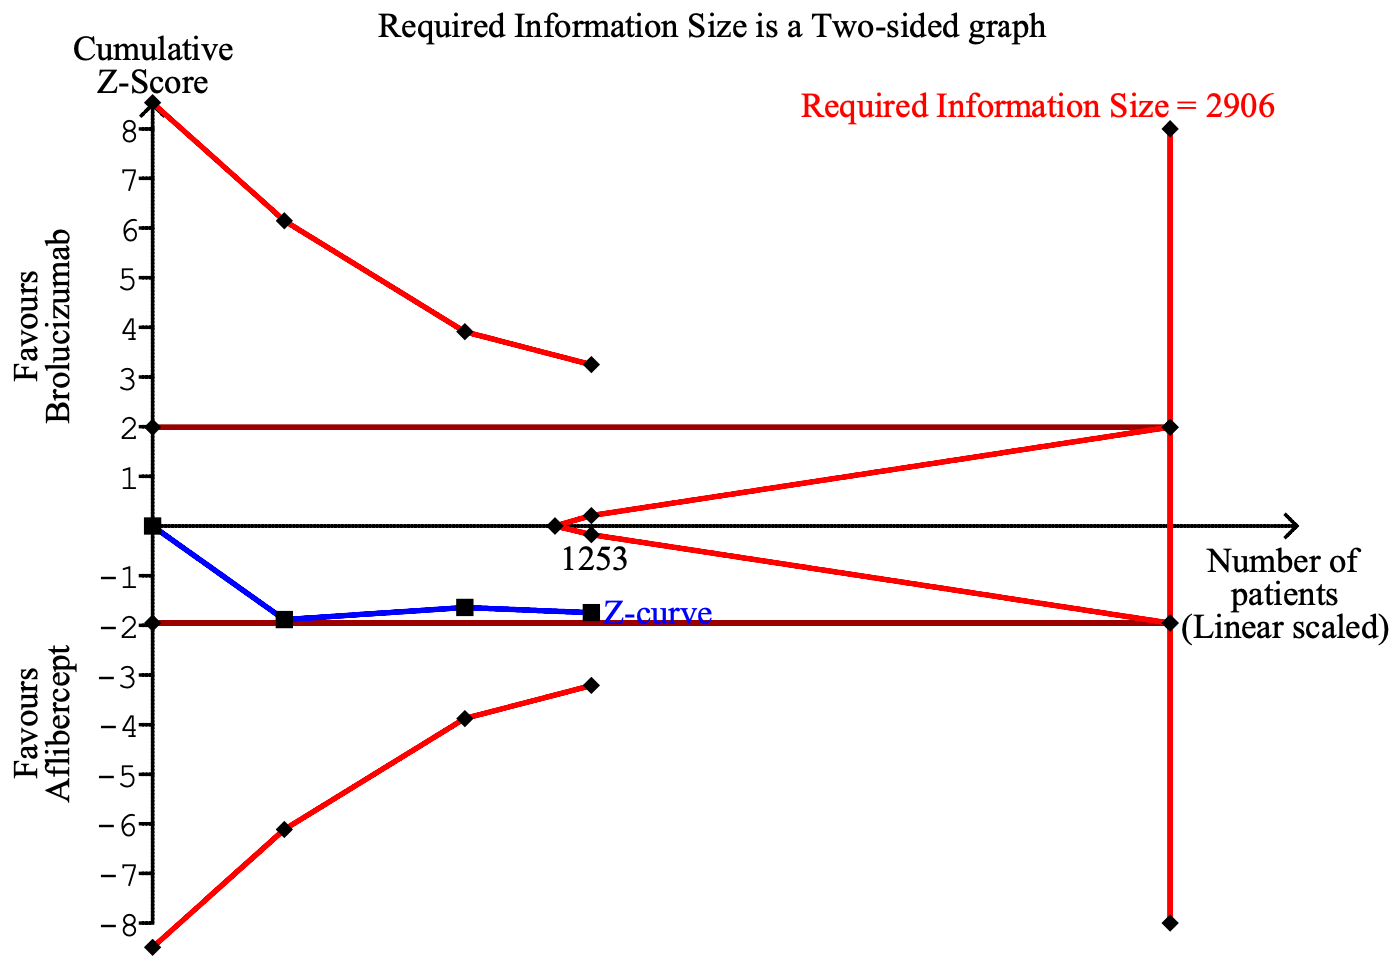
**

**eFigure 1C.** Trial sequential analysis of the incidence of intraocular inflammation. The required information size to detect or reject the effect size found in our meta-analysis is calculated to 2,631 patients and 2,631 eyes, with a double sided α of 0.05 and a β of 0.20 (power of 80%). The cumulative Z-curve did not reach any of the boundaries.


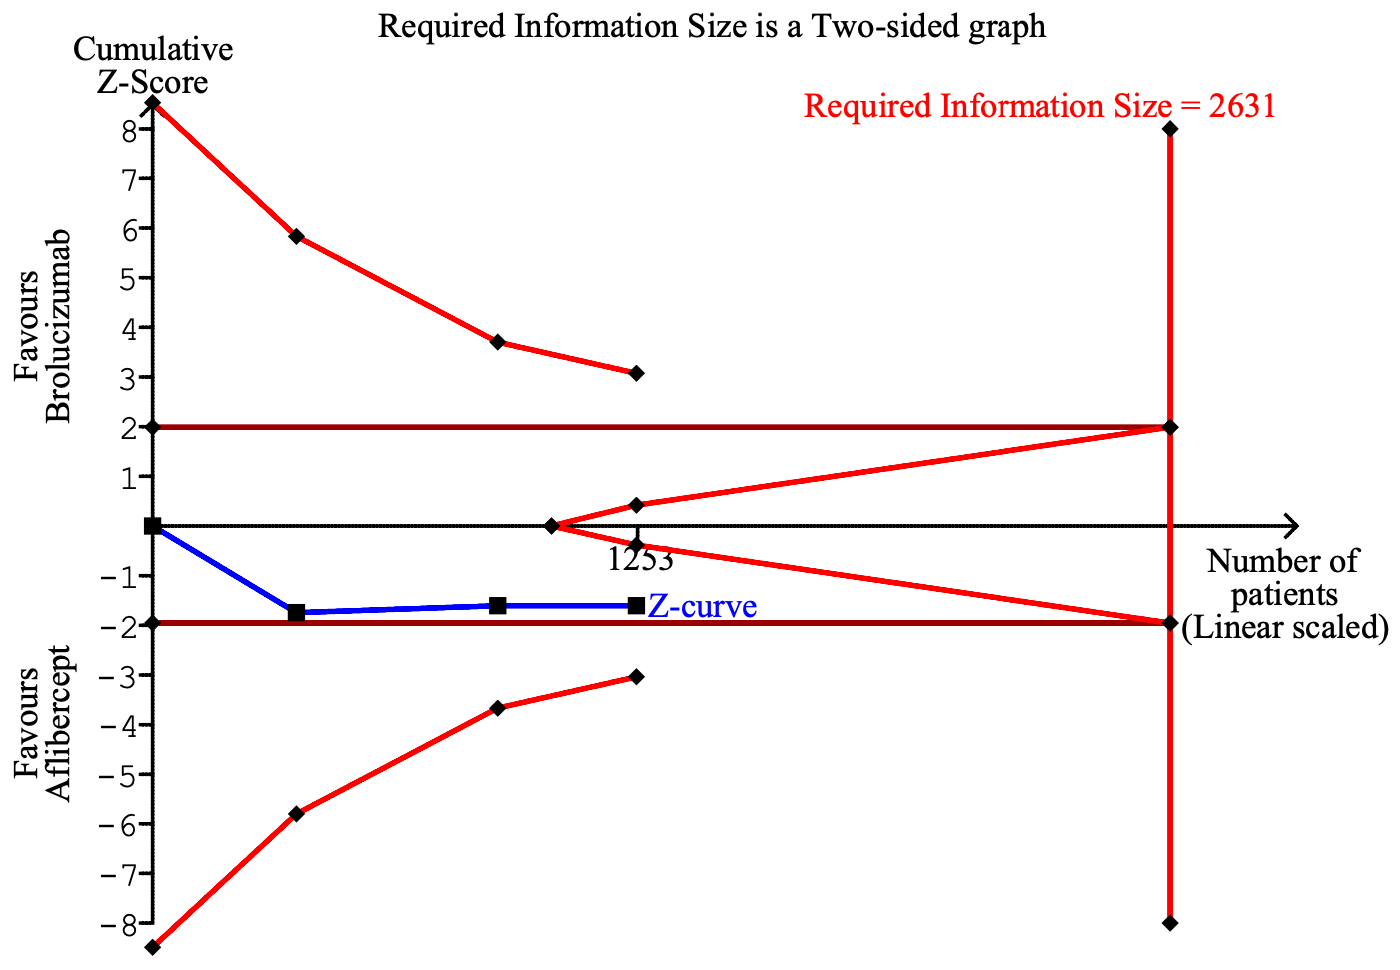


**eFigure 1D.** Trial sequential analysis of the incidence of retinal vasculitis. The required information size to detect or reject the effect size found in our meta-analysis is calculated to 8,286 patients and 8,286 eyes, with a double sided α of 0.05 and a β of 0.20 (power of 80%). The cumulative Z-curve did not reach any of the boundaries.

**
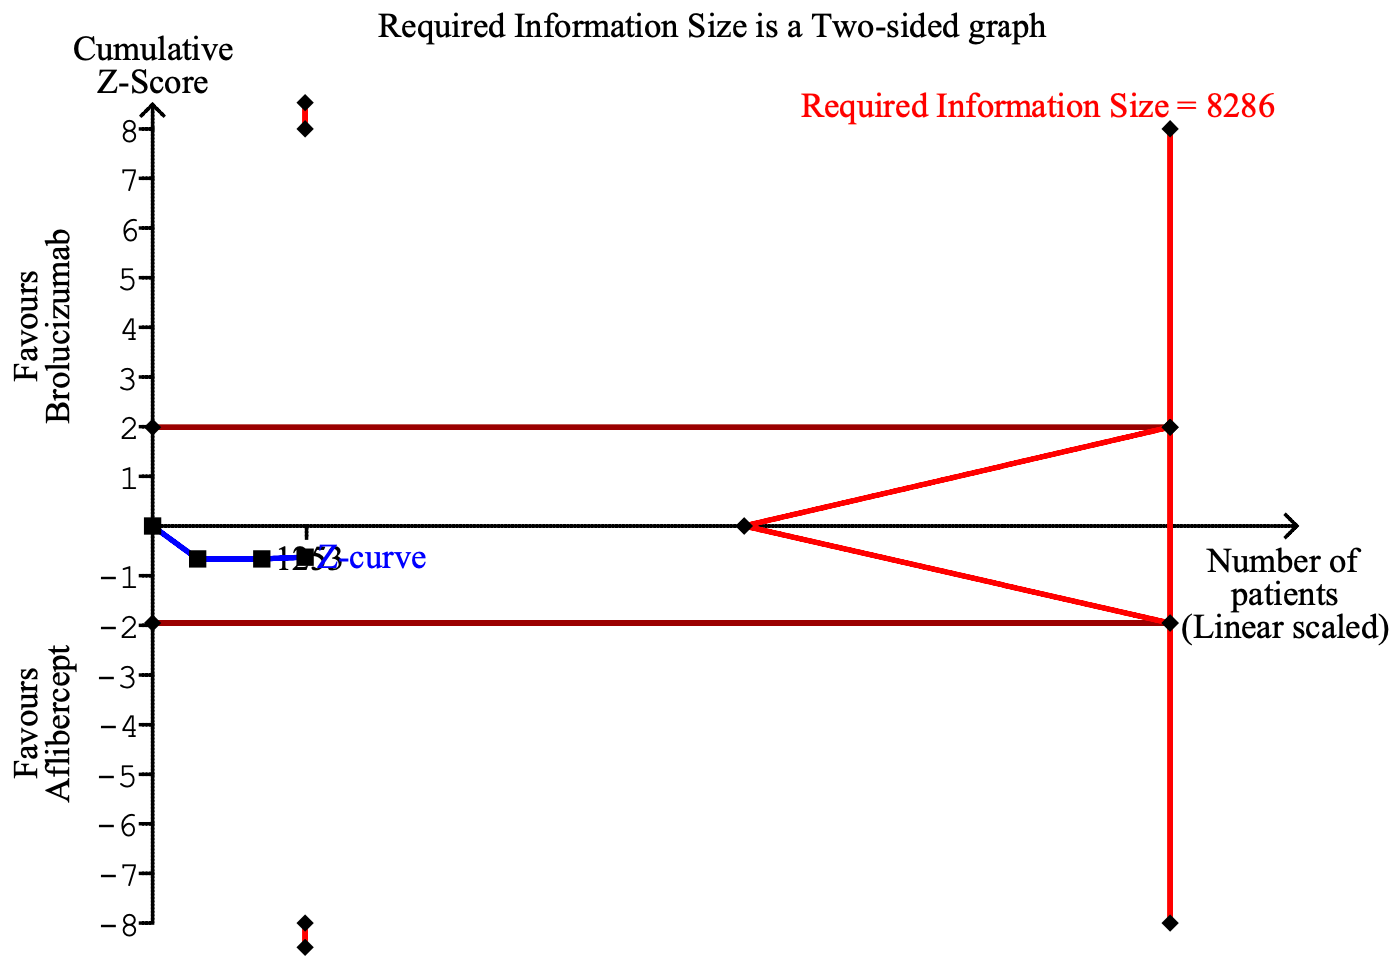
**
